# Supplementary material
Source: publisher figshare collection journal article supplement (https://gsajournals.figshare.com/ndownloader/files/23581841)
Supplement: Supplementary file 1 [file 23581841]

## Sheet: Table S4
Source1	Source2	Target	ƒ3	Standard error	Z-score
Turkey1	Landes	Brecon Buff	0.036268	0.016316	2.223
Turkey1	West of England	Brecon Buff	0.070255	0.019496	3.604
Turkey1	Domestic NW-Turkey	Brecon Buff	0.071292	0.01948	3.66
Russia	Landes	Brecon Buff	0.087544	0.020217	4.33
Turkey2	West of England	Brecon Buff	0.076487	0.017512	4.368
Turkey2	Landes	Brecon Buff	0.093346	0.021342	4.374
Northern Finland	Landes	Brecon Buff	0.093744	0.018889	4.963
Fereydunkenar, Iran	Landes	Brecon Buff	0.095777	0.01858	5.155
Kazakhstan	Landes	Brecon Buff	0.106754	0.019724	5.412
Turkey1	Domestic NE-Turkey	Brecon Buff	0.130547	0.023475	5.561
Denmark	Landes	Brecon Buff	0.10591	0.018986	5.578
Netherlands	Landes	Brecon Buff	0.092064	0.016427	5.604
Smola, Norway	Landes	Brecon Buff	0.102619	0.018157	5.652
Russia	West of England	Brecon Buff	0.115776	0.020469	5.656
Gilan, Iran	Landes	Brecon Buff	0.099873	0.017567	5.685
Greece	Landes	Brecon Buff	0.105335	0.018525	5.686
Turkey2	Domestic NE-Turkey	Brecon Buff	0.121593	0.021285	5.713
Northern Finland	West of England	Brecon Buff	0.106318	0.018281	5.816
Russia	Domestic NW-Turkey	Brecon Buff	0.131663	0.022475	5.858
Southern Finland	Landes	Brecon Buff	0.096836	0.01639	5.908
Turkey1	Domestic N-Turkey	Brecon Buff	0.156251	0.026364	5.927
Kazakhstan	West of England	Brecon Buff	0.101846	0.016731	6.087
Turkey2	Domestic NW-Turkey	Brecon Buff	0.131797	0.021606	6.1
Vega, Norway	Landes	Brecon Buff	0.105389	0.017127	6.153
Russia	Domestic N-Turkey	Brecon Buff	0.135874	0.021546	6.306
Fereydunkenar, Iran	West of England	Brecon Buff	0.107424	0.016998	6.32
Turkey2	Domestic N-Turkey	Brecon Buff	0.132191	0.020833	6.345
Netherlands	West of England	Brecon Buff	0.102945	0.015949	6.455
Southern Finland	West of England	Brecon Buff	0.107871	0.016543	6.521
Gilan, Iran	West of England	Brecon Buff	0.112086	0.017135	6.541
Vega, Norway	West of England	Brecon Buff	0.113519	0.017012	6.673
Fereydunkenar, Iran	Domestic NW-Turkey	Brecon Buff	0.12788	0.018886	6.771
Northern Finland	Domestic NW-Turkey	Brecon Buff	0.125228	0.018472	6.779
Greece	West of England	Brecon Buff	0.122807	0.018084	6.791
Smola, Norway	West of England	Brecon Buff	0.113671	0.016642	6.83
Kazakhstan	Domestic NW-Turkey	Brecon Buff	0.124408	0.018082	6.88
Denmark	West of England	Brecon Buff	0.118864	0.017264	6.885
Gilan, Iran	Domestic NW-Turkey	Brecon Buff	0.129018	0.018447	6.994
Netherlands	Domestic NW-Turkey	Brecon Buff	0.122519	0.017426	7.031
Greece	Domestic N-Turkey	Brecon Buff	0.136239	0.019075	7.142
Russia	Domestic NE-Turkey	Brecon Buff	0.161564	0.022473	7.189
Southern Finland	Domestic NW-Turkey	Brecon Buff	0.126644	0.017416	7.272
Fereydunkenar, Iran	Domestic N-Turkey	Brecon Buff	0.139201	0.019136	7.274
Greece	Domestic NE-Turkey	Brecon Buff	0.148123	0.020207	7.33
Greece	Domestic NW-Turkey	Brecon Buff	0.134948	0.01839	7.338
Smola, Norway	Domestic NW-Turkey	Brecon Buff	0.134199	0.017953	7.475
Denmark	Domestic NW-Turkey	Brecon Buff	0.135237	0.017793	7.601
Northern Finland	Domestic N-Turkey	Brecon Buff	0.134868	0.017716	7.613
Fereydunkenar, Iran	Domestic NE-Turkey	Brecon Buff	0.153135	0.019981	7.664
Kazakhstan	Domestic N-Turkey	Brecon Buff	0.135617	0.017675	7.673
Southern Finland	Domestic N-Turkey	Brecon Buff	0.135448	0.017516	7.733
Denmark	Domestic N-Turkey	Brecon Buff	0.147668	0.018942	7.796
Netherlands	Domestic N-Turkey	Brecon Buff	0.126104	0.016119	7.823
Gilan, Iran	Domestic N-Turkey	Brecon Buff	0.141523	0.017988	7.868
Smola, Norway	Domestic NE-Turkey	Brecon Buff	0.14887	0.018911	7.872
Netherlands	Domestic NE-Turkey	Brecon Buff	0.13629	0.017274	7.89
Northern Finland	Domestic NE-Turkey	Brecon Buff	0.145266	0.018307	7.935
Kazakhstan	Domestic NE-Turkey	Brecon Buff	0.149137	0.01874	7.958
Southern Finland	Domestic NE-Turkey	Brecon Buff	0.146611	0.01821	8.051
Denmark	Domestic NE-Turkey	Brecon Buff	0.155338	0.019171	8.103
Smola, Norway	Domestic N-Turkey	Brecon Buff	0.142446	0.017369	8.201
Gilan, Iran	Domestic NE-Turkey	Brecon Buff	0.157724	0.019194	8.217
Vega, Norway	Domestic NW-Turkey	Brecon Buff	0.14375	0.017254	8.332
Vega, Norway	Domestic NE-Turkey	Brecon Buff	0.154252	0.018099	8.523
Vega, Norway	Domestic N-Turkey	Brecon Buff	0.14571	0.016865	8.64
Greece	Landes	Buff	0.058227	0.028175	2.067
Russia	Landes	Buff	0.052577	0.024561	2.141
Turkey1	Domestic NW-Turkey	Buff	0.083342	0.038511	2.164
Northern Finland	Landes	Buff	0.065133	0.029429	2.213
Turkey2	West of England	Buff	0.067623	0.030297	2.232
Turkey1	West of England	Buff	0.090612	0.04039	2.243
Netherlands	Landes	Buff	0.059921	0.026667	2.247
Smola, Norway	Landes	Buff	0.062366	0.027332	2.282
Denmark	Landes	Buff	0.067204	0.029077	2.311
Gilan, Iran	Landes	Buff	0.065291	0.028226	2.313
Greece	Domestic N-Turkey	Buff	0.080673	0.034504	2.338
Fereydunkenar, Iran	Landes	Buff	0.065692	0.027746	2.368
Turkey2	Landes	Buff	0.078373	0.031608	2.48
Southern Finland	Landes	Buff	0.070572	0.027667	2.551
Vega, Norway	Landes	Buff	0.070313	0.027548	2.552
Netherlands	Domestic N-Turkey	Buff	0.086425	0.033369	2.59
Netherlands	West of England	Buff	0.076454	0.028961	2.64
Russia	Domestic N-Turkey	Buff	0.091572	0.034657	2.642
Smola, Norway	West of England	Buff	0.07991	0.02999	2.665
Smola, Norway	Domestic N-Turkey	Buff	0.094484	0.034548	2.735
Greece	Domestic NE-Turkey	Buff	0.097491	0.035363	2.757
Kazakhstan	Landes	Buff	0.082925	0.030058	2.759
Greece	West of England	Buff	0.082887	0.029926	2.77
Northern Finland	Domestic N-Turkey	Buff	0.09777	0.035037	2.79
Northern Finland	West of England	Buff	0.083503	0.029693	2.812
Denmark	Domestic N-Turkey	Buff	0.101141	0.035914	2.816
Greece	Domestic NW-Turkey	Buff	0.087603	0.030947	2.831
Turkey2	Domestic NE-Turkey	Buff	0.10237	0.036077	2.838
Gilan, Iran	Domestic N-Turkey	Buff	0.099099	0.034531	2.87
Fereydunkenar, Iran	West of England	Buff	0.083305	0.028949	2.878
Denmark	West of England	Buff	0.087185	0.030282	2.879
Vega, Norway	West of England	Buff	0.084457	0.029323	2.88
Kazakhstan	West of England	Buff	0.081667	0.028138	2.902
Vega, Norway	Domestic N-Turkey	Buff	0.102165	0.034946	2.924
Gilan, Iran	West of England	Buff	0.083254	0.028455	2.926
Kazakhstan	Domestic N-Turkey	Buff	0.101022	0.034419	2.935
Southern Finland	Domestic N-Turkey	Buff	0.101183	0.03437	2.944
Russia	West of England	Buff	0.084098	0.028519	2.949
Turkey2	Domestic N-Turkey	Buff	0.109706	0.037074	2.959
Fereydunkenar, Iran	Domestic N-Turkey	Buff	0.101087	0.033943	2.978
Southern Finland	West of England	Buff	0.08749	0.029153	3.001
Smola, Norway	Domestic NW-Turkey	Buff	0.093734	0.031202	3.004
Gilan, Iran	Domestic NW-Turkey	Buff	0.093517	0.031119	3.005
Northern Finland	Domestic NW-Turkey	Buff	0.095582	0.031793	3.006
Netherlands	Domestic NW-Turkey	Buff	0.089446	0.029354	3.047
Denmark	Domestic NW-Turkey	Buff	0.096418	0.03115	3.095
Fereydunkenar, Iran	Domestic NW-Turkey	Buff	0.097158	0.031344	3.1
Russia	Domestic NW-Turkey	Buff	0.09607	0.030561	3.143
Smola, Norway	Domestic NE-Turkey	Buff	0.105102	0.033305	3.156
Kazakhstan	Domestic NW-Turkey	Buff	0.098463	0.030679	3.209
Netherlands	Domestic NE-Turkey	Buff	0.101482	0.031558	3.216
Southern Finland	Domestic NW-Turkey	Buff	0.099576	0.030554	3.259
Denmark	Domestic NE-Turkey	Buff	0.113865	0.034795	3.272
Turkey1	Domestic NE-Turkey	Buff	0.14426	0.044009	3.278
Turkey2	Domestic NW-Turkey	Buff	0.119189	0.036201	3.292
Northern Finland	Domestic NE-Turkey	Buff	0.113332	0.034363	3.298
Vega, Norway	Domestic NE-Turkey	Buff	0.115149	0.033461	3.441
Fereydunkenar, Iran	Domestic NE-Turkey	Buff	0.11963	0.034732	3.444
Gilan, Iran	Domestic NE-Turkey	Buff	0.119786	0.034765	3.446
Vega, Norway	Domestic NW-Turkey	Buff	0.108058	0.031241	3.459
Russia	Domestic NE-Turkey	Buff	0.11872	0.034234	3.468
Southern Finland	Domestic NE-Turkey	Buff	0.117055	0.033637	3.48
Turkey1	Domestic N-Turkey	Buff	0.166899	0.047173	3.538
Kazakhstan	Domestic NE-Turkey	Buff	0.120192	0.033774	3.559
Turkey1	Landes	Crested Faroese	0.078684	0.026787	2.937
Turkey1	West of England	Crested Faroese	0.100339	0.027225	3.685
Turkey1	Domestic NW-Turkey	Crested Faroese	0.103798	0.025165	4.125
Turkey1	Domestic NE-Turkey	Crested Faroese	0.137102	0.026214	5.23
Turkey1	Domestic N-Turkey	Crested Faroese	0.149311	0.02673	5.586
Russia	Landes	Crested Faroese	0.200011	0.034162	5.855
Smola, Norway	Landes	Crested Faroese	0.206494	0.033574	6.15
Denmark	Landes	Crested Faroese	0.207718	0.0337	6.164
Northern Finland	Landes	Crested Faroese	0.202939	0.032696	6.207
Southern Finland	Landes	Crested Faroese	0.205609	0.033036	6.224
Greece	Landes	Crested Faroese	0.215445	0.034603	6.226
Vega, Norway	Landes	Crested Faroese	0.208353	0.032914	6.33
Netherlands	Landes	Crested Faroese	0.20373	0.031597	6.448
Turkey2	West of England	Crested Faroese	0.199386	0.030719	6.491
Gilan, Iran	Landes	Crested Faroese	0.208916	0.03197	6.535
Turkey2	Landes	Crested Faroese	0.217922	0.033321	6.54
Fereydunkenar, Iran	Landes	Crested Faroese	0.203726	0.031002	6.571
Kazakhstan	Landes	Crested Faroese	0.218965	0.032215	6.797
Russia	West of England	Crested Faroese	0.219625	0.031582	6.954
Kazakhstan	West of England	Crested Faroese	0.210656	0.030231	6.968
Greece	West of England	Crested Faroese	0.225548	0.032264	6.991
Vega, Norway	West of England	Crested Faroese	0.210989	0.030039	7.024
Gilan, Iran	West of England	Crested Faroese	0.214722	0.030483	7.044
Northern Finland	West of England	Crested Faroese	0.208773	0.029613	7.05
Denmark	West of England	Crested Faroese	0.213844	0.030252	7.069
Southern Finland	West of England	Crested Faroese	0.210413	0.029721	7.08
Smola, Norway	West of England	Crested Faroese	0.211659	0.029839	7.093
Netherlands	West of England	Crested Faroese	0.207961	0.029148	7.135
Fereydunkenar, Iran	West of England	Crested Faroese	0.209122	0.028873	7.243
Russia	Domestic N-Turkey	Crested Faroese	0.205774	0.028042	7.338
Russia	Domestic NW-Turkey	Crested Faroese	0.231852	0.031418	7.38
Greece	Domestic NW-Turkey	Crested Faroese	0.239167	0.031699	7.545
Gilan, Iran	Domestic NW-Turkey	Crested Faroese	0.232367	0.030543	7.608
Denmark	Domestic NW-Turkey	Crested Faroese	0.231991	0.030483	7.61
Southern Finland	Domestic NW-Turkey	Crested Faroese	0.230113	0.030051	7.657
Northern Finland	Domestic NW-Turkey	Crested Faroese	0.229105	0.029904	7.661
Turkey2	Domestic NE-Turkey	Crested Faroese	0.222448	0.029002	7.67
Kazakhstan	Domestic NW-Turkey	Crested Faroese	0.2336	0.030231	7.727
Smola, Norway	Domestic NW-Turkey	Crested Faroese	0.232653	0.030089	7.732
Netherlands	Domestic NW-Turkey	Crested Faroese	0.22831	0.029194	7.82
Fereydunkenar, Iran	Domestic NW-Turkey	Crested Faroese	0.229865	0.029388	7.822
Vega, Norway	Domestic NW-Turkey	Crested Faroese	0.239857	0.030628	7.831
Greece	Domestic N-Turkey	Crested Faroese	0.210687	0.02676	7.873
Smola, Norway	Domestic NE-Turkey	Crested Faroese	0.227231	0.028634	7.936
Denmark	Domestic N-Turkey	Crested Faroese	0.212646	0.026788	7.938
Northern Finland	Domestic N-Turkey	Crested Faroese	0.207366	0.026112	7.942
Russia	Domestic NE-Turkey	Crested Faroese	0.236672	0.029791	7.945
Greece	Domestic NE-Turkey	Crested Faroese	0.232948	0.029318	7.946
Southern Finland	Domestic N-Turkey	Crested Faroese	0.207728	0.026138	7.947
Netherlands	Domestic N-Turkey	Crested Faroese	0.202354	0.025413	7.963
Southern Finland	Domestic NE-Turkey	Crested Faroese	0.229008	0.028731	7.971
Vega, Norway	Domestic NE-Turkey	Crested Faroese	0.230936	0.028947	7.978
Vega, Norway	Domestic N-Turkey	Crested Faroese	0.212095	0.026537	7.993
Netherlands	Domestic NE-Turkey	Crested Faroese	0.223138	0.027886	8.002
Smola, Norway	Domestic N-Turkey	Crested Faroese	0.209993	0.026209	8.012
Northern Finland	Domestic NE-Turkey	Crested Faroese	0.228194	0.028476	8.014
Gilan, Iran	Domestic N-Turkey	Crested Faroese	0.212693	0.026509	8.024
Denmark	Domestic NE-Turkey	Crested Faroese	0.231449	0.028775	8.043
Turkey2	Domestic N-Turkey	Crested Faroese	0.219335	0.027093	8.096
Fereydunkenar, Iran	Domestic N-Turkey	Crested Faroese	0.210087	0.025743	8.161
Turkey2	Domestic NW-Turkey	Crested Faroese	0.250048	0.030621	8.166
Kazakhstan	Domestic N-Turkey	Crested Faroese	0.213223	0.026058	8.183
Kazakhstan	Domestic NE-Turkey	Crested Faroese	0.236504	0.028633	8.26
Fereydunkenar, Iran	Domestic NE-Turkey	Crested Faroese	0.233283	0.028141	8.29
Gilan, Iran	Domestic NE-Turkey	Crested Faroese	0.23738	0.028457	8.342
Russia	Landes	Domestic NW-Turkey	0.091781	0.022669	4.049
Turkey2	Landes	Domestic NW-Turkey	0.089963	0.018158	4.954
Turkey2	Domestic NE-Turkey	Domestic NW-Turkey	0.087025	0.017322	5.024
Turkey1	Landes	Domestic NW-Turkey	0.096166	0.018902	5.087
Denmark	Landes	Domestic NW-Turkey	0.105597	0.018824	5.61
Vega, Norway	Landes	Domestic NW-Turkey	0.094173	0.016694	5.641
Turkey2	West of England	Domestic NW-Turkey	0.098548	0.017028	5.788
Northern Finland	Landes	Domestic NW-Turkey	0.104367	0.018003	5.797
Fereydunkenar, Iran	Landes	Domestic NW-Turkey	0.102924	0.017563	5.86
Greece	Landes	Domestic NW-Turkey	0.106139	0.017755	5.978
Gilan, Iran	Landes	Domestic NW-Turkey	0.106411	0.017091	6.226
Smola, Norway	Landes	Domestic NW-Turkey	0.102695	0.016106	6.376
Turkey1	West of England	Domestic NW-Turkey	0.171983	0.026779	6.422
Netherlands	Landes	Domestic NW-Turkey	0.103611	0.01603	6.463
Russia	Domestic NE-Turkey	Domestic NW-Turkey	0.137141	0.021037	6.519
Southern Finland	Landes	Domestic NW-Turkey	0.105406	0.015565	6.772
Turkey2	Domestic N-Turkey	Domestic NW-Turkey	0.121589	0.017699	6.87
Kazakhstan	Landes	Domestic NW-Turkey	0.121213	0.01762	6.879
Greece	Domestic NE-Turkey	Domestic NW-Turkey	0.123475	0.017668	6.988
Russia	Domestic N-Turkey	Domestic NW-Turkey	0.130952	0.0183	7.156
Russia	West of England	Domestic NW-Turkey	0.147889	0.020454	7.23
Kazakhstan	West of England	Domestic NW-Turkey	0.14255	0.019443	7.332
Northern Finland	Domestic NE-Turkey	Domestic NW-Turkey	0.130965	0.017666	7.413
Vega, Norway	West of England	Domestic NW-Turkey	0.134556	0.018109	7.431
Smola, Norway	Domestic NE-Turkey	Domestic NW-Turkey	0.125126	0.016803	7.447
Southern Finland	Domestic NE-Turkey	Domestic NW-Turkey	0.131414	0.017277	7.606
Gilan, Iran	Domestic NE-Turkey	Domestic NW-Turkey	0.142206	0.018692	7.608
Netherlands	Domestic NE-Turkey	Domestic NW-Turkey	0.123283	0.016191	7.614
Denmark	Domestic NE-Turkey	Domestic NW-Turkey	0.131048	0.01721	7.615
Fereydunkenar, Iran	Domestic NE-Turkey	Domestic NW-Turkey	0.137598	0.01805	7.623
Vega, Norway	Domestic NE-Turkey	Domestic NW-Turkey	0.118836	0.015438	7.698
Northern Finland	West of England	Domestic NW-Turkey	0.149113	0.019252	7.745
Kazakhstan	Domestic NE-Turkey	Domestic NW-Turkey	0.137261	0.01755	7.821
Smola, Norway	West of England	Domestic NW-Turkey	0.146388	0.01857	7.883
Smola, Norway	Domestic N-Turkey	Domestic NW-Turkey	0.134258	0.01687	7.958
Gilan, Iran	West of England	Domestic NW-Turkey	0.150895	0.018932	7.97
Fereydunkenar, Iran	West of England	Domestic NW-Turkey	0.146522	0.018229	8.038
Greece	West of England	Domestic NW-Turkey	0.157287	0.019352	8.128
Southern Finland	West of England	Domestic NW-Turkey	0.148587	0.018279	8.129
Vega, Norway	Domestic N-Turkey	Domestic NW-Turkey	0.126021	0.015429	8.168
Netherlands	Domestic N-Turkey	Domestic NW-Turkey	0.129397	0.015795	8.192
Northern Finland	Domestic N-Turkey	Domestic NW-Turkey	0.134925	0.016446	8.204
Netherlands	West of England	Domestic NW-Turkey	0.147534	0.017937	8.225
Greece	Domestic N-Turkey	Domestic NW-Turkey	0.125467	0.015048	8.338
Turkey1	Domestic NE-Turkey	Domestic NW-Turkey	0.179493	0.021512	8.344
Denmark	West of England	Domestic NW-Turkey	0.151902	0.018128	8.38
Kazakhstan	Domestic N-Turkey	Domestic NW-Turkey	0.137622	0.016103	8.546
Fereydunkenar, Iran	Domestic N-Turkey	Domestic NW-Turkey	0.137952	0.016082	8.578
Turkey1	Domestic N-Turkey	Domestic NW-Turkey	0.227669	0.026338	8.644
Gilan, Iran	Domestic N-Turkey	Domestic NW-Turkey	0.139626	0.015958	8.749
Denmark	Domestic N-Turkey	Domestic NW-Turkey	0.13907	0.015809	8.797
Southern Finland	Domestic N-Turkey	Domestic NW-Turkey	0.135099	0.015307	8.826
Turkey1	Landes	Embden	-0.02946	0.012	-2.455
Southern Finland	Landes	Embden	0.01814	0.008796	2.062
Turkey2	West of England	Embden	0.020992	0.009282	2.262
Vega, Norway	Landes	Embden	0.022226	0.009613	2.312
Netherlands	Landes	Embden	0.020506	0.00788	2.602
Kazakhstan	Landes	Embden	0.035087	0.011361	3.089
Greece	West of England	Embden	0.041863	0.010926	3.831
Turkey1	Domestic NE-Turkey	Embden	0.057649	0.014842	3.884
Kazakhstan	West of England	Embden	0.04211	0.010781	3.906
Northern Finland	West of England	Embden	0.041683	0.010188	4.091
Southern Finland	West of England	Embden	0.041315	0.009886	4.179
Fereydunkenar, Iran	West of England	Embden	0.039179	0.009224	4.247
Vega, Norway	West of England	Embden	0.042362	0.009945	4.26
Smola, Norway	West of England	Embden	0.041909	0.009797	4.278
Gilan, Iran	West of England	Embden	0.039809	0.009288	4.286
Denmark	West of England	Embden	0.042184	0.009751	4.326
Turkey2	Domestic NE-Turkey	Embden	0.055265	0.012549	4.404
Turkey1	Domestic N-Turkey	Embden	0.090557	0.01956	4.63
Netherlands	West of England	Embden	0.043313	0.009	4.813
Russia	West of England	Embden	0.044393	0.00821	5.407
Greece	Domestic NE-Turkey	Embden	0.059582	0.010823	5.505
Greece	Domestic NW-Turkey	Embden	0.051945	0.009414	5.518
Turkey2	Domestic NW-Turkey	Embden	0.070201	0.012665	5.543
Russia	Domestic NW-Turkey	Embden	0.057556	0.01025	5.615
Gilan, Iran	Domestic NW-Turkey	Embden	0.054331	0.00916	5.931
Fereydunkenar, Iran	Domestic NW-Turkey	Embden	0.057336	0.009469	6.055
Denmark	Domestic NW-Turkey	Embden	0.056036	0.009082	6.17
Russia	Domestic NE-Turkey	Embden	0.073925	0.01176	6.286
Greece	Domestic N-Turkey	Embden	0.05581	0.008786	6.352
Russia	Domestic N-Turkey	Embden	0.063925	0.009951	6.424
Denmark	Domestic NE-Turkey	Embden	0.069251	0.010635	6.511
Southern Finland	Domestic NW-Turkey	Embden	0.057403	0.00877	6.545
Northern Finland	Domestic NW-Turkey	Embden	0.057856	0.008708	6.644
Turkey2	Domestic N-Turkey	Embden	0.073767	0.010942	6.741
Smola, Norway	Domestic NW-Turkey	Embden	0.059303	0.008795	6.743
Fereydunkenar, Iran	Domestic NE-Turkey	Embden	0.075271	0.01115	6.751
Kazakhstan	Domestic NW-Turkey	Embden	0.062724	0.009244	6.785
Smola, Norway	Domestic NE-Turkey	Embden	0.068099	0.009989	6.817
Vega, Norway	Domestic NE-Turkey	Embden	0.073362	0.010674	6.873
Northern Finland	Domestic NE-Turkey	Embden	0.071115	0.010243	6.943
Smola, Norway	Domestic N-Turkey	Embden	0.069086	0.009906	6.974
Netherlands	Domestic NW-Turkey	Embden	0.060085	0.008555	7.023
Netherlands	Domestic N-Turkey	Embden	0.066661	0.009428	7.07
Southern Finland	Domestic NE-Turkey	Embden	0.070695	0.009948	7.107
Netherlands	Domestic NE-Turkey	Embden	0.067716	0.009496	7.131
Northern Finland	Domestic N-Turkey	Embden	0.068459	0.00959	7.138
Southern Finland	Domestic N-Turkey	Embden	0.067901	0.009479	7.164
Denmark	Domestic N-Turkey	Embden	0.069739	0.009678	7.206
Kazakhstan	Domestic N-Turkey	Embden	0.075176	0.01027	7.32
Fereydunkenar, Iran	Domestic N-Turkey	Embden	0.070167	0.009583	7.322
Vega, Norway	Domestic N-Turkey	Embden	0.073244	0.00996	7.354
Kazakhstan	Domestic NE-Turkey	Embden	0.080213	0.010699	7.497
Vega, Norway	Domestic NW-Turkey	Embden	0.069046	0.009209	7.498
Gilan, Iran	Domestic N-Turkey	Embden	0.068064	0.008763	7.767
Gilan, Iran	Domestic NE-Turkey	Embden	0.07536	0.009334	8.074
Russia	Landes	Danish Landrace Goose	0.057611	0.017767	3.243
Turkey1	West of England	Danish Landrace Goose	0.057714	0.017546	3.289
Turkey1	Domestic NW-Turkey	Danish Landrace Goose	0.055571	0.014852	3.742
Denmark	Landes	Danish Landrace Goose	0.067042	0.01548	4.331
Greece	Landes	Danish Landrace Goose	0.068055	0.015473	4.398
Turkey2	West of England	Danish Landrace Goose	0.056083	0.012365	4.535
Northern Finland	Landes	Danish Landrace Goose	0.062555	0.013601	4.599
Vega, Norway	Landes	Danish Landrace Goose	0.062456	0.013522	4.619
Southern Finland	Landes	Danish Landrace Goose	0.065128	0.013683	4.76
Smola, Norway	Landes	Danish Landrace Goose	0.065956	0.0138	4.78
Netherlands	Landes	Danish Landrace Goose	0.057715	0.0119	4.85
Gilan, Iran	Landes	Danish Landrace Goose	0.065732	0.01328	4.95
Turkey2	Landes	Danish Landrace Goose	0.076639	0.015369	4.987
Fereydunkenar, Iran	Landes	Danish Landrace Goose	0.069423	0.013861	5.008
Russia	West of England	Danish Landrace Goose	0.081882	0.013804	5.932
Vega, Norway	West of England	Danish Landrace Goose	0.068499	0.011206	6.113
Kazakhstan	West of England	Danish Landrace Goose	0.075416	0.012268	6.147
Greece	West of England	Danish Landrace Goose	0.083978	0.013551	6.197
Kazakhstan	Landes	Danish Landrace Goose	0.083695	0.013224	6.329
Northern Finland	West of England	Danish Landrace Goose	0.072562	0.011319	6.41
Smola, Norway	West of England	Danish Landrace Goose	0.075523	0.011406	6.621
Denmark	West of England	Danish Landrace Goose	0.077989	0.011743	6.642
Greece	Domestic NW-Turkey	Danish Landrace Goose	0.092551	0.013777	6.718
Netherlands	West of England	Danish Landrace Goose	0.067463	0.010015	6.736
Russia	Domestic NW-Turkey	Danish Landrace Goose	0.091643	0.013582	6.747
Turkey1	Domestic NE-Turkey	Danish Landrace Goose	0.109839	0.016237	6.765
Southern Finland	West of England	Danish Landrace Goose	0.074604	0.011022	6.769
Gilan, Iran	West of England	Danish Landrace Goose	0.075451	0.010772	7.004
Denmark	Domestic NW-Turkey	Danish Landrace Goose	0.09113	0.012838	7.098
Fereydunkenar, Iran	West of England	Danish Landrace Goose	0.078976	0.010754	7.344
Russia	Domestic N-Turkey	Danish Landrace Goose	0.099206	0.013494	7.352
Turkey2	Domestic NE-Turkey	Danish Landrace Goose	0.093192	0.01236	7.54
Greece	Domestic NE-Turkey	Danish Landrace Goose	0.10179	0.013388	7.603
Turkey1	Domestic N-Turkey	Danish Landrace Goose	0.143484	0.01882	7.624
Netherlands	Domestic NW-Turkey	Danish Landrace Goose	0.083988	0.010908	7.699
Gilan, Iran	Domestic NW-Turkey	Danish Landrace Goose	0.089446	0.011576	7.727
Southern Finland	Domestic NW-Turkey	Danish Landrace Goose	0.090322	0.011616	7.775
Turkey2	Domestic NW-Turkey	Danish Landrace Goose	0.110566	0.013909	7.949
Russia	Domestic NE-Turkey	Danish Landrace Goose	0.11383	0.014082	8.084
Kazakhstan	Domestic NW-Turkey	Danish Landrace Goose	0.095382	0.011727	8.133
Northern Finland	Domestic NW-Turkey	Danish Landrace Goose	0.088514	0.010761	8.225
Fereydunkenar, Iran	Domestic NW-Turkey	Danish Landrace Goose	0.096851	0.01176	8.236
Smola, Norway	Domestic NW-Turkey	Danish Landrace Goose	0.092845	0.011086	8.375
Vega, Norway	Domestic NW-Turkey	Danish Landrace Goose	0.096264	0.011416	8.432
Greece	Domestic N-Turkey	Danish Landrace Goose	0.095698	0.011128	8.599
Denmark	Domestic NE-Turkey	Danish Landrace Goose	0.106693	0.012368	8.627
Smola, Norway	Domestic NE-Turkey	Danish Landrace Goose	0.103462	0.011439	9.045
Denmark	Domestic N-Turkey	Danish Landrace Goose	0.105538	0.011346	9.302
Netherlands	Domestic N-Turkey	Danish Landrace Goose	0.089823	0.009593	9.363
Southern Finland	Domestic NE-Turkey	Danish Landrace Goose	0.106114	0.011262	9.423
Smola, Norway	Domestic N-Turkey	Danish Landrace Goose	0.10329	0.010961	9.423
Turkey2	Domestic N-Turkey	Danish Landrace Goose	0.112561	0.011838	9.508
Netherlands	Domestic NE-Turkey	Danish Landrace Goose	0.09313	0.009726	9.575
Fereydunkenar, Iran	Domestic NE-Turkey	Danish Landrace Goose	0.118009	0.012095	9.757
Kazakhstan	Domestic N-Turkey	Danish Landrace Goose	0.108569	0.011076	9.802
Southern Finland	Domestic N-Turkey	Danish Landrace Goose	0.101433	0.010301	9.847
Vega, Norway	Domestic NE-Turkey	Danish Landrace Goose	0.101789	0.010183	9.996
Kazakhstan	Domestic NE-Turkey	Danish Landrace Goose	0.115802	0.011526	10.047
Fereydunkenar, Iran	Domestic N-Turkey	Danish Landrace Goose	0.110445	0.010962	10.075
Vega, Norway	Domestic N-Turkey	Danish Landrace Goose	0.099806	0.00976	10.226
Gilan, Iran	Domestic NE-Turkey	Danish Landrace Goose	0.114094	0.011054	10.322
Northern Finland	Domestic NE-Turkey	Danish Landrace Goose	0.104282	0.010034	10.393
Northern Finland	Domestic N-Turkey	Danish Landrace Goose	0.099955	0.00939	10.645
Gilan, Iran	Domestic N-Turkey	Danish Landrace Goose	0.104309	0.009503	10.977
Turkey1	Landes	Oland Goose	0.344808	0.1251	2.756
Turkey1	Domestic NW-Turkey	Oland Goose	0.413932	0.14128	2.93
Turkey1	West of England	Oland Goose	0.435155	0.144745	3.006
Russia	Landes	Oland Goose	0.420499	0.136378	3.083
Northern Finland	Landes	Oland Goose	0.41406	0.128398	3.225
Denmark	Landes	Oland Goose	0.436122	0.134204	3.25
Fereydunkenar, Iran	Landes	Oland Goose	0.431922	0.132868	3.251
Greece	Landes	Oland Goose	0.424231	0.13001	3.263
Netherlands	Landes	Oland Goose	0.42667	0.130244	3.276
Gilan, Iran	Landes	Oland Goose	0.43462	0.131933	3.294
Russia	Domestic NW-Turkey	Oland Goose	0.48713	0.14712	3.311
Russia	West of England	Oland Goose	0.48363	0.14599	3.313
Smola, Norway	Landes	Oland Goose	0.434575	0.130852	3.321
Turkey1	Domestic NE-Turkey	Oland Goose	0.504695	0.151881	3.323
Southern Finland	Landes	Oland Goose	0.436364	0.131009	3.331
Vega, Norway	Landes	Oland Goose	0.439623	0.131164	3.352
Kazakhstan	Landes	Oland Goose	0.456346	0.135546	3.367
Northern Finland	West of England	Oland Goose	0.475204	0.139879	3.397
Kazakhstan	West of England	Oland Goose	0.491973	0.142817	3.445
Turkey1	Domestic N-Turkey	Oland Goose	0.572262	0.165914	3.449
Netherlands	West of England	Oland Goose	0.485917	0.140212	3.466
Fereydunkenar, Iran	West of England	Oland Goose	0.491331	0.141553	3.471
Northern Finland	Domestic NW-Turkey	Oland Goose	0.48309	0.138893	3.478
Gilan, Iran	West of England	Oland Goose	0.497561	0.142825	3.484
Southern Finland	West of England	Oland Goose	0.497696	0.142603	3.49
Russia	Domestic NE-Turkey	Oland Goose	0.530339	0.151691	3.496
Denmark	West of England	Oland Goose	0.498874	0.142652	3.497
Vega, Norway	West of England	Oland Goose	0.497002	0.142134	3.497
Netherlands	Domestic NW-Turkey	Oland Goose	0.492193	0.140545	3.502
Smola, Norway	West of England	Oland Goose	0.49527	0.141027	3.512
Turkey2	West of England	Oland Goose	0.48498	0.137783	3.52
Greece	West of England	Oland Goose	0.496079	0.140835	3.522
Denmark	Domestic NW-Turkey	Oland Goose	0.501528	0.142242	3.526
Fereydunkenar, Iran	Domestic NW-Turkey	Oland Goose	0.503998	0.14262	3.534
Russia	Domestic N-Turkey	Oland Goose	0.520901	0.146747	3.55
Southern Finland	Domestic NW-Turkey	Oland Goose	0.503823	0.141763	3.554
Greece	Domestic NW-Turkey	Oland Goose	0.488932	0.137496	3.556
Gilan, Iran	Domestic NW-Turkey	Oland Goose	0.500769	0.140644	3.561
Kazakhstan	Domestic NW-Turkey	Oland Goose	0.509595	0.143033	3.563
Smola, Norway	Domestic NW-Turkey	Oland Goose	0.502546	0.141007	3.564
Turkey2	Landes	Oland Goose	0.482187	0.135123	3.569
Vega, Norway	Domestic NW-Turkey	Oland Goose	0.522445	0.144668	3.611
Northern Finland	Domestic NE-Turkey	Oland Goose	0.512533	0.141652	3.618
Netherlands	Domestic NE-Turkey	Oland Goose	0.512303	0.141153	3.629
Denmark	Domestic NE-Turkey	Oland Goose	0.530907	0.144479	3.675
Fereydunkenar, Iran	Domestic NE-Turkey	Oland Goose	0.539549	0.146596	3.681
Netherlands	Domestic N-Turkey	Oland Goose	0.515682	0.139936	3.685
Northern Finland	Domestic N-Turkey	Oland Goose	0.516477	0.139725	3.696
Vega, Norway	Domestic NE-Turkey	Oland Goose	0.535709	0.144676	3.703
Kazakhstan	Domestic NE-Turkey	Oland Goose	0.545389	0.147159	3.706
Greece	Domestic NE-Turkey	Oland Goose	0.511099	0.137652	3.713
Southern Finland	Domestic NE-Turkey	Oland Goose	0.534992	0.143865	3.719
Turkey2	Domestic NW-Turkey	Oland Goose	0.555771	0.149375	3.721
Turkey2	Domestic NE-Turkey	Oland Goose	0.527789	0.141437	3.732
Smola, Norway	Domestic NE-Turkey	Oland Goose	0.524013	0.140114	3.74
Denmark	Domestic N-Turkey	Oland Goose	0.539603	0.144139	3.744
Gilan, Iran	Domestic NE-Turkey	Oland Goose	0.543178	0.145019	3.746
Fereydunkenar, Iran	Domestic N-Turkey	Oland Goose	0.538476	0.143596	3.75
Greece	Domestic N-Turkey	Oland Goose	0.512089	0.136243	3.759
Kazakhstan	Domestic N-Turkey	Oland Goose	0.54194	0.14413	3.76
Gilan, Iran	Domestic N-Turkey	Oland Goose	0.538079	0.142753	3.769
Vega, Norway	Domestic N-Turkey	Oland Goose	0.541471	0.143354	3.777
Southern Finland	Domestic N-Turkey	Oland Goose	0.538466	0.142464	3.78
Smola, Norway	Domestic N-Turkey	Oland Goose	0.533557	0.140931	3.786
Turkey2	Domestic N-Turkey	Oland Goose	0.571831	0.14552	3.93
Turkey1	Landes	Scania Goose	0.098281	0.025622	3.836
Turkey1	West of England	Scania Goose	0.14596	0.03034	4.811
Russia	Landes	Scania Goose	0.118498	0.022197	5.338
Turkey1	Domestic NW-Turkey	Scania Goose	0.144224	0.026487	5.445
Denmark	Landes	Scania Goose	0.123506	0.021146	5.841
Greece	Landes	Scania Goose	0.126196	0.020789	6.07
Turkey2	Landes	Scania Goose	0.147801	0.023679	6.242
Turkey1	Domestic NE-Turkey	Scania Goose	0.188194	0.029062	6.476
Vega, Norway	Landes	Scania Goose	0.133965	0.020591	6.506
Turkey2	West of England	Scania Goose	0.143144	0.021983	6.512
Southern Finland	Landes	Scania Goose	0.132714	0.020271	6.547
Smola, Norway	Landes	Scania Goose	0.134661	0.020387	6.605
Fereydunkenar, Iran	Landes	Scania Goose	0.131573	0.019562	6.726
Turkey1	Domestic N-Turkey	Scania Goose	0.235036	0.033426	7.031
Gilan, Iran	Landes	Scania Goose	0.128634	0.018144	7.09
Northern Finland	Landes	Scania Goose	0.127482	0.017968	7.095
Netherlands	Landes	Scania Goose	0.131273	0.018284	7.18
Turkey2	Domestic NE-Turkey	Scania Goose	0.167553	0.022919	7.31
Denmark	Domestic NE-Turkey	Scania Goose	0.167348	0.022654	7.387
Kazakhstan	Landes	Scania Goose	0.157194	0.021222	7.407
Russia	West of England	Scania Goose	0.159941	0.021205	7.543
Greece	Domestic NE-Turkey	Scania Goose	0.1643	0.021455	7.658
Russia	Domestic NW-Turkey	Scania Goose	0.169235	0.022012	7.688
Kazakhstan	West of England	Scania Goose	0.162332	0.020639	7.865
Russia	Domestic N-Turkey	Scania Goose	0.169273	0.021474	7.883
Denmark	Domestic NW-Turkey	Scania Goose	0.164181	0.020728	7.921
Vega, Norway	West of England	Scania Goose	0.157188	0.0196	8.02
Russia	Domestic NE-Turkey	Scania Goose	0.179409	0.022347	8.028
Denmark	West of England	Scania Goose	0.152829	0.018977	8.054
Fereydunkenar, Iran	West of England	Scania Goose	0.157366	0.01912	8.23
Gilan, Iran	West of England	Scania Goose	0.154924	0.018766	8.256
Fereydunkenar, Iran	Domestic NW-Turkey	Scania Goose	0.176048	0.021217	8.298
Netherlands	Domestic NE-Turkey	Scania Goose	0.169394	0.02039	8.308
Fereydunkenar, Iran	Domestic NE-Turkey	Scania Goose	0.185519	0.022293	8.322
Gilan, Iran	Domestic NW-Turkey	Scania Goose	0.16927	0.020264	8.353
Kazakhstan	Domestic NW-Turkey	Scania Goose	0.184461	0.022066	8.359
Greece	West of England	Scania Goose	0.160639	0.019211	8.362
Greece	Domestic N-Turkey	Scania Goose	0.167889	0.019759	8.497
Greece	Domestic NW-Turkey	Scania Goose	0.167786	0.019675	8.528
Kazakhstan	Domestic NE-Turkey	Scania Goose	0.191052	0.022384	8.535
Northern Finland	West of England	Scania Goose	0.155115	0.018123	8.559
Southern Finland	Domestic NE-Turkey	Scania Goose	0.178266	0.020762	8.586
Denmark	Domestic N-Turkey	Scania Goose	0.177077	0.020593	8.599
Vega, Norway	Domestic NE-Turkey	Scania Goose	0.179058	0.020768	8.622
Turkey2	Domestic N-Turkey	Scania Goose	0.199846	0.023154	8.631
Vega, Norway	Domestic NW-Turkey	Scania Goose	0.18702	0.02162	8.65
Turkey2	Domestic NW-Turkey	Scania Goose	0.199696	0.02305	8.663
Smola, Norway	Domestic NE-Turkey	Scania Goose	0.176131	0.020313	8.671
Gilan, Iran	Domestic NE-Turkey	Scania Goose	0.182822	0.021073	8.676
Southern Finland	West of England	Scania Goose	0.158462	0.01815	8.731
Northern Finland	Domestic NE-Turkey	Scania Goose	0.175872	0.020052	8.771
Netherlands	West of England	Scania Goose	0.155761	0.017672	8.814
Northern Finland	Domestic NW-Turkey	Scania Goose	0.172124	0.019407	8.869
Kazakhstan	Domestic N-Turkey	Scania Goose	0.193122	0.021748	8.88
Southern Finland	Domestic NW-Turkey	Scania Goose	0.174567	0.019609	8.903
Smola, Norway	West of England	Scania Goose	0.160863	0.018025	8.924
Netherlands	Domestic NW-Turkey	Scania Goose	0.17244	0.019249	8.958
Fereydunkenar, Iran	Domestic N-Turkey	Scania Goose	0.187443	0.020789	9.016
Smola, Norway	Domestic NW-Turkey	Scania Goose	0.178709	0.019789	9.031
Gilan, Iran	Domestic N-Turkey	Scania Goose	0.182318	0.020114	9.064
Netherlands	Domestic N-Turkey	Scania Goose	0.176007	0.018833	9.346
Vega, Norway	Domestic N-Turkey	Scania Goose	0.186076	0.019902	9.35
Southern Finland	Domestic N-Turkey	Scania Goose	0.183378	0.019228	9.537
Northern Finland	Domestic N-Turkey	Scania Goose	0.180403	0.018669	9.663
Smola, Norway	Domestic N-Turkey	Scania Goose	0.185728	0.018878	9.838
Turkey1	West of England	Tufted Roman	0.055505	0.020427	2.717
Turkey1	Domestic NW-Turkey	Tufted Roman	0.061339	0.018228	3.365
Russia	Landes	Tufted Roman	0.050505	0.013411	3.766
Gilan, Iran	Landes	Tufted Roman	0.05442	0.012437	4.376
Denmark	Landes	Tufted Roman	0.055414	0.01246	4.447
Turkey2	Landes	Tufted Roman	0.06175	0.013793	4.477
Fereydunkenar, Iran	Landes	Tufted Roman	0.060717	0.012826	4.734
Southern Finland	Landes	Tufted Roman	0.059512	0.012433	4.787
Netherlands	Landes	Tufted Roman	0.051701	0.010798	4.788
Turkey1	Domestic NE-Turkey	Tufted Roman	0.107127	0.022169	4.832
Greece	Landes	Tufted Roman	0.061692	0.012747	4.84
Northern Finland	Landes	Tufted Roman	0.05626	0.011516	4.885
Vega, Norway	Landes	Tufted Roman	0.061032	0.012137	5.029
Smola, Norway	Landes	Tufted Roman	0.054167	0.010528	5.145
Turkey2	West of England	Tufted Roman	0.070536	0.013349	5.284
Kazakhstan	Landes	Tufted Roman	0.069808	0.012411	5.625
Turkey1	Domestic N-Turkey	Tufted Roman	0.148146	0.024373	6.078
Kazakhstan	West of England	Tufted Roman	0.088837	0.013781	6.446
Gilan, Iran	West of England	Tufted Roman	0.090745	0.013846	6.554
Northern Finland	West of England	Tufted Roman	0.091721	0.013831	6.632
Netherlands	West of England	Tufted Roman	0.086859	0.012919	6.723
Turkey2	Domestic NE-Turkey	Tufted Roman	0.107175	0.015844	6.764
Southern Finland	West of England	Tufted Roman	0.094036	0.013834	6.798
Fereydunkenar, Iran	West of England	Tufted Roman	0.096598	0.014155	6.824
Denmark	West of England	Tufted Roman	0.09192	0.013217	6.955
Russia	Domestic NW-Turkey	Tufted Roman	0.112544	0.015991	7.038
Vega, Norway	West of England	Tufted Roman	0.093948	0.013335	7.045
Russia	West of England	Tufted Roman	0.101526	0.01432	7.09
Greece	West of England	Tufted Roman	0.102858	0.014156	7.266
Smola, Norway	West of England	Tufted Roman	0.090089	0.012399	7.266
Russia	Domestic NE-Turkey	Tufted Roman	0.129264	0.017743	7.285
Turkey2	Domestic NW-Turkey	Tufted Roman	0.127018	0.017003	7.471
Russia	Domestic N-Turkey	Tufted Roman	0.120589	0.016057	7.51
Gilan, Iran	Domestic NW-Turkey	Tufted Roman	0.108859	0.01443	7.544
Greece	Domestic NW-Turkey	Tufted Roman	0.115979	0.015009	7.727
Denmark	Domestic NW-Turkey	Tufted Roman	0.109935	0.01404	7.83
Fereydunkenar, Iran	Domestic NW-Turkey	Tufted Roman	0.11844	0.014704	8.055
Southern Finland	Domestic NW-Turkey	Tufted Roman	0.114268	0.014154	8.073
Greece	Domestic NE-Turkey	Tufted Roman	0.119496	0.014787	8.081
Denmark	Domestic NE-Turkey	Tufted Roman	0.12012	0.014776	8.13
Netherlands	Domestic NW-Turkey	Tufted Roman	0.108002	0.013192	8.187
Netherlands	Domestic NE-Turkey	Tufted Roman	0.111967	0.013596	8.235
Northern Finland	Domestic NW-Turkey	Tufted Roman	0.112274	0.013564	8.277
Northern Finland	Domestic NE-Turkey	Tufted Roman	0.122491	0.014728	8.317
Fereydunkenar, Iran	Domestic NE-Turkey	Tufted Roman	0.133668	0.016019	8.344
Smola, Norway	Domestic NW-Turkey	Tufted Roman	0.111476	0.013344	8.354
Vega, Norway	Domestic NE-Turkey	Tufted Roman	0.125228	0.014976	8.362
Kazakhstan	Domestic NW-Turkey	Tufted Roman	0.11257	0.013435	8.379
Smola, Norway	Domestic NE-Turkey	Tufted Roman	0.116185	0.013851	8.388
Southern Finland	Domestic NE-Turkey	Tufted Roman	0.12401	0.014777	8.392
Greece	Domestic N-Turkey	Tufted Roman	0.120896	0.014104	8.572
Kazakhstan	Domestic NE-Turkey	Tufted Roman	0.126782	0.014537	8.721
Netherlands	Domestic N-Turkey	Tufted Roman	0.115527	0.013056	8.849
Turkey2	Domestic N-Turkey	Tufted Roman	0.132228	0.0149	8.874
Southern Finland	Domestic N-Turkey	Tufted Roman	0.126187	0.0142	8.886
Gilan, Iran	Domestic NE-Turkey	Tufted Roman	0.126958	0.014185	8.95
Vega, Norway	Domestic NW-Turkey	Tufted Roman	0.125312	0.013916	9.005
Fereydunkenar, Iran	Domestic N-Turkey	Tufted Roman	0.13329	0.014668	9.087
Denmark	Domestic N-Turkey	Tufted Roman	0.125331	0.013637	9.191
Gilan, Iran	Domestic N-Turkey	Tufted Roman	0.124364	0.013516	9.201
Smola, Norway	Domestic N-Turkey	Tufted Roman	0.122903	0.013325	9.223
Kazakhstan	Domestic N-Turkey	Tufted Roman	0.126869	0.013681	9.274
Northern Finland	Domestic N-Turkey	Tufted Roman	0.12491	0.013434	9.298
Vega, Norway	Domestic N-Turkey	Tufted Roman	0.130423	0.013818	9.438
